# Supplementary material for: Human carboxylesterases: a comprehensive review
Source: PubMed Central journal article supplement — Acta Pharm Sin B. 2018 Jun 25;8(5):699–712. doi: 10.1016/j.apsb.2018.05.005 (PMC6146386; doi:10.1016/j.apsb.2018.05.005), 2018-06-25
Supplement: mmc1.pdf [file mmc1.pdf]

## Supplementary materials

### REVIEW

#### Human carboxylesterases: a comprehensive review

Dandan Wang<sup>a,†</sup>, Liwei Zou<sup>a,†</sup>, Qiang Jin<sup>a</sup>, Jie Hou<sup>b</sup>, Guangbo Ge<sup>a,\*</sup>, Ling Yang<sup>a</sup>

<sup>a</sup>*Institute of Interdisciplinary Medicine, Shanghai University of Traditional Chinese Medicine, Shanghai 201203, China*

<sup>b</sup>*Dalian Medical University, Dalian 116044, China*

\*Corresponding author.

E-mail address: geguangbo@dicp.ac.cn (Guangbo Ge)

†These authors made equal contribution to this work.

**Table S1** Enzyme kinetic parameters of typical drug substrate of CES.

| Substrate    | Structure                                                                           | Enzyme source | Kinetic parameter              |                                              | Ref. |
|--------------|-------------------------------------------------------------------------------------|---------------|--------------------------------|----------------------------------------------|------|
|              |                                                                                     |               | $K_m$<br>( $\mu\text{mol/L}$ ) | $V_{\text{max}}$<br>( $\text{nmol/min/mg}$ ) |      |
| Clopidogrel  | 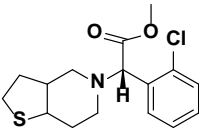   | HLM           | 62.7                           | 3.56                                         | 10   |
| Trandolapril |    | HLM           | 1734                           | 624                                          | 50   |
| Imidapril    |    | HLM           | 245                            | 2.4                                          | 4    |
| Sacubitril   |   | HLM           | 767.2                          | 557.5                                        | 55   |
| Oseltamivir  |  | HLM           | 380                            | 145                                          | 11   |
| CPT-11       |  | CES2          | 3.4                            | 2.5                                          | 24   |
| Prasugrel    |  | CES2          | 49.8                           | 54839                                        | 54   |

HLM: human liver microsomes.

**Table S2** Optical probe substrates for high-throughput screening of CES inhibitors.

| Substrate | Structure                                                                           | Enzyme source | Kinetic parameter              |                                              | Method and detection condition                                | Ref. |
|-----------|-------------------------------------------------------------------------------------|---------------|--------------------------------|----------------------------------------------|---------------------------------------------------------------|------|
|           |                                                                                     |               | $K_m$<br>( $\mu\text{mol/L}$ ) | $V_{\text{max}}$<br>( $\text{nmol/min/mg}$ ) |                                                               |      |
| DME       | 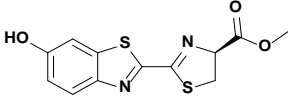   | CES1          | 4.51                           | 1208,000                                     | Bioluminescence<br>$\lambda_{\text{em}} = 560 \text{ nm}$     | 49   |
|           |                                                                                     | HLM           | 3.60                           | 1441,000                                     |                                                               |      |
| BMBT      |    | CES1          | 12.18                          | 93070                                        | Fluorescence<br>$\lambda_{\text{ex/em}} = 304/488 \text{ nm}$ | 61   |
| FD        |    | CES2          | 4.82                           | 14,600                                       | Fluorescence<br>$\lambda_{\text{ex/em}} = 483/525 \text{ nm}$ | 51   |
|           |                                                                                     | HLM           | 4.87                           | 18,500                                       |                                                               |      |
|           |                                                                                     | HIM           | 4.04                           | 39,050                                       |                                                               |      |
| TCFB      |   | CES2          | 3.06                           | 5.84                                         | Fluorescence<br>$\lambda_{\text{ex/em}} = 560/612 \text{ nm}$ | 58   |
|           |                                                                                     | HLM           | 2.19                           | 14.7                                         |                                                               |      |
|           |                                                                                     | HIM           | 2.14                           | 12.8                                         |                                                               |      |
| NCEN      |  | CES2          | 8.58                           | 34.87                                        | Fluorescence<br>$\lambda_{\text{ex/em}} = 430/542 \text{ nm}$ | 60   |
|           |                                                                                     | HLM           | 6.13                           | 4.52                                         |                                                               |      |
|           |                                                                                     | HIM           | 8.12                           | 5.08                                         |                                                               |      |
| DDAB      |  | CES2          | 1.92                           | 20.4                                         | Fluorescence<br>$\lambda_{\text{ex/em}} = 600/662 \text{ nm}$ | 63   |
|           |                                                                                     | HLM           | 1.83                           | 16.5                                         |                                                               |      |
| HIM       |                                                                                     | HIM           | 0.95                           | 8.88                                         |                                                               |      |
|           |                                                                                     |               |                                |                                              |                                                               |      |
| BNN       |  | CES2          | ND                             | ND                                           | Fluorescence<br>$\lambda_{\text{ex/em}} = 452/564 \text{ nm}$ | 62   |
| EBHF      |  | CES2          | 162                            | 17.84                                        | Fluorescence<br>$\lambda_{\text{ex/em}} = 346/528 \text{ nm}$ | 59   |

HLM: human liver microsomes; HIM: human intestine microsomes. The detection conditions are depicted for the corresponding hydrolytic metabolite.

**Table S3** The regulatory effects of some inducers of CES.

| Substrate                 | Structure                                                                          | Cell line                 | <i>n</i> -Folds of induction (mRNA) |      | Ref. |
|---------------------------|------------------------------------------------------------------------------------|---------------------------|-------------------------------------|------|------|
|                           |                                                                                    |                           | CES1                                | CES2 |      |
| NO-1886                   | 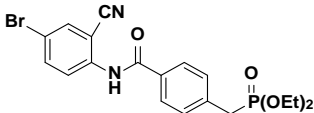  | Human primary hepatocytes | 1.4                                 | 2.6  | 136  |
|                           |                                                                                    | Human dermal fibroblasts  | 2.6                                 | ND   | 133  |
| Trinitrobenzene sulfonate |   | HT1080                    | 3.1                                 | ND   | 133  |
|                           |                                                                                    | Human primary hepatocytes | 1.5                                 | ND   | 133  |
|                           |                                                                                    | Huh 7                     | 3.7                                 | ND   | 133  |
|                           |                                                                                    | Human dermal fibroblasts  | 3.8                                 | ND   | 133  |
| Sulforaphane              |  | HT1080                    | 2.1                                 | ND   | 133  |
|                           |                                                                                    | Human primary hepatocytes | 2.7                                 | ND   | 133  |
|                           |                                                                                    | Huh 7                     | 3.9                                 | ND   | 133  |
